# Supplementary material for: Electron shuttle in the MOF derived TiO2/CuO heterojunction boosts light driven hydrogen evolution
Source: Royal Society of Chemistry journal article supplement (doi:10.1039/d0ta12220c), 2021-01-01
Supplement: d0ta12220c1.pdf [file d0ta12220c1.pdf]

## **Electron Shuttle in MOF Derived TiO<sub>2</sub>/CuO Heterojunction Boosts Light Driven Hydrogen Evolution**

*Yunbo Zhang,<sup>a,b</sup> Wenhui Hu,<sup>b</sup> Denan Wang,<sup>b</sup> Benjamin J. Reinhart,<sup>c</sup> Jier Huang<sup>b\*</sup>*

<sup>a</sup>School of Applied Physics and Materials, Wuyi University, Jiangmen, 529020, China

<sup>b</sup>Department of Chemistry, Marquette University, Milwaukee, Wisconsin, 53201

<sup>c</sup>X-ray Science Division, Argonne National Laboratory, Argonne, Illinois, 60349

### **Corresponding Author**

\*Jier Huang ([jier.huang@marquette.edu](mailto:jier.huang@marquette.edu))

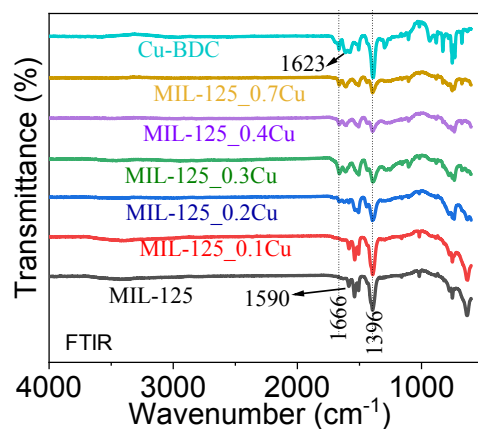

**Figure S1.** The FTIR spectra of MIL-125, MIL-125<sub>x</sub>Cu, and Cu-BDC.

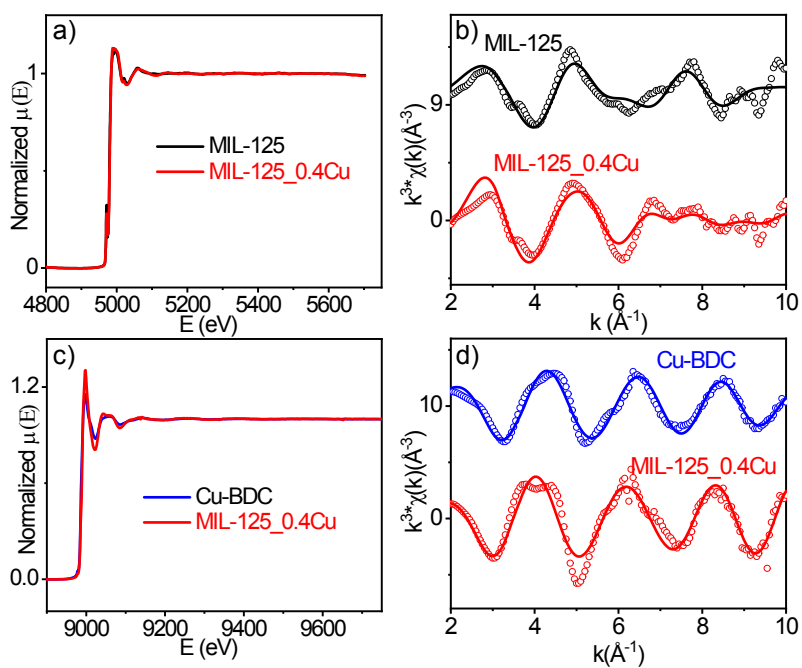

**Figure S2.** The EXAFS spectra of MIL-125 and MIL-125<sub>0.4</sub>Cu at Ti k-edge in energy space (a) and k-space (b). The EXAFS spectra of Cu-BDC and MIL-125<sub>0.4</sub>Cu at Cu k-edge in energy space (c) and k-space (d). The solid lines in (b) and (d) are the fitting results.

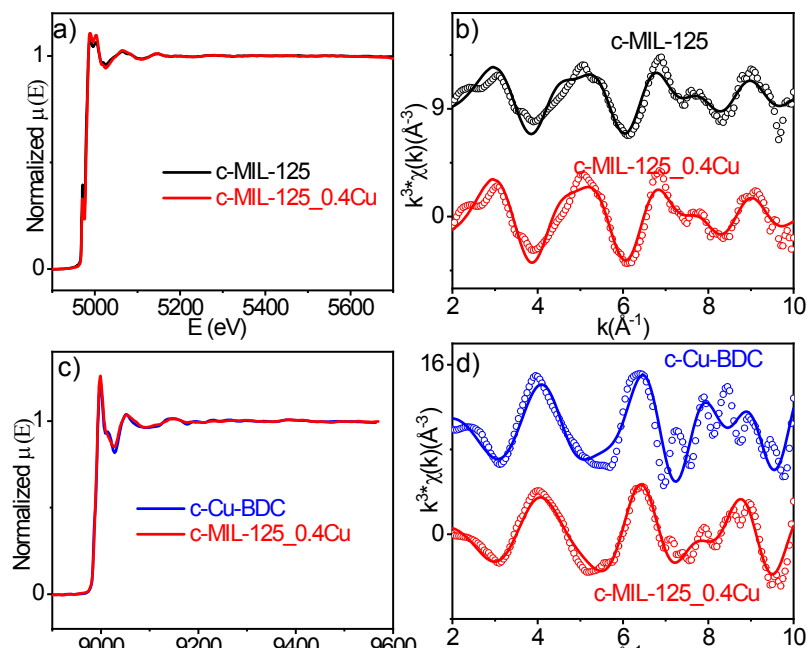

**Figure S3.** The EXAFS spectra of c-MIL-125 and c-MIL-125\_0.4Cu at Ti k-edge in energy space (a) and k-space (b). The EXAFS spectra of c-Cu-BDC and c-MIL-125\_0.4Cu at Cu k-edge in energy space (c) and k-space (d). The solid lines in (b) and (d) are the fitting results.

**Table S1.** The EXAFS fitting parameters for MIL-125 and MIL-125\_0.4Cu at Ti k-edge

| Sample        | Vector            | N    | $\sigma^2$ ( $\text{\AA}^2$ ) | R ( $\text{\AA}$ ) |
|---------------|-------------------|------|-------------------------------|--------------------|
| MIL-125       | Ti-O <sub>1</sub> | 3.05 | 0.01                          | 1.82               |
|               | Ti-O <sub>2</sub> | 0.43 | 0.01                          | 1.96               |
|               | Ti-O <sub>3</sub> | 1    | 0.01                          | 2.07               |
|               | Ti-(O)-Ti         | 0.86 | 0.01                          | 2.67               |
| MIL-125_0.4Cu | Ti-O <sub>1</sub> | 2.5  | 0.009                         | 1.82               |
|               | Ti-O <sub>2</sub> | 0.75 | 0.01                          | 1.97               |
|               | Ti-O <sub>3</sub> | 2.14 | 0.009                         | 2.03               |
|               | Ti-(O)-Ti         | 0.7  | 0.01                          | 3.04               |

**Table S2.** The EXAFS fitting parameters for Cu-BDC and MIL-125\_0.4Cu at Cu k-edge

| Sample        | Vector            | N    | $\sigma^2$ (Å <sup>2</sup> ) | R (Å) |
|---------------|-------------------|------|------------------------------|-------|
| Cu-BDC        | Cu-O <sub>1</sub> | 4    | 0.006                        | 1.96  |
|               | Cu-O <sub>2</sub> | 1    | 0.0062                       | 2.25  |
| MIL-125_0.4Cu | Cu-O <sub>1</sub> | 4.25 | 0.0034                       | 1.99  |
|               | Cu-O <sub>2</sub> | 1.43 | 0.001                        | 2.23  |

**Table S3.** The EXAFS fitting parameters for c-MIL-125 and c-MIL-125\_0.4Cu at Ti k-edge

| Sample          | Vector    | N    | $\sigma^2$ (Å <sup>2</sup> ) | R (Å) |
|-----------------|-----------|------|------------------------------|-------|
| c-MIL-125       | Ti-O      | 2.68 | 0.01                         | 1.94  |
|                 | Ti-(O)-Ti | 1.58 | 0.01                         | 3.05  |
| c-MIL-125_0.4Cu | Ti-O      | 3.4  | 0.01                         | 1.93  |
|                 | Ti-(O)-Ti | 1.65 | 0.01                         | 3.04  |

**Table S4.** The EXAFS fitting parameters for c-Cu-BDC and c-MIL-125\_0.4Cu at Cu k-edge

| Sample          | Vector    | N | $\sigma^2$ (Å <sup>2</sup> ) | R (Å) |
|-----------------|-----------|---|------------------------------|-------|
| c-Cu-BDC        | Cu-O      | 4 | 0.0052                       | 1.94  |
|                 | Cu-(O)-Cu | 2 | 0.006                        | 2.88  |
| C-MIL-125_0.4Cu | Cu-O      | 4 | 0.0059                       | 1.89  |
|                 | Cu-(O)-Cu | 2 | 0.0087                       | 2.90  |

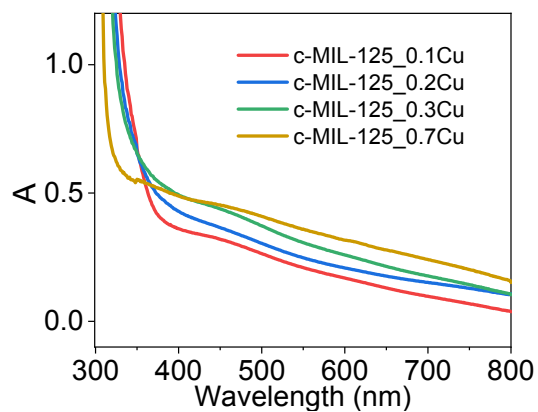

**Figure S4.** Diffuse reflectance spectra of c-MIL-125\_xCu.

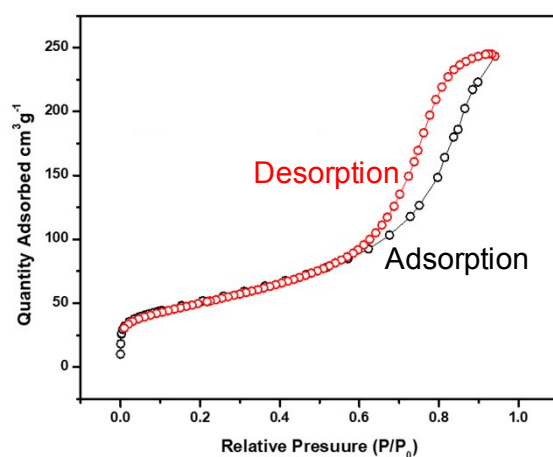

**Figure S5.** N<sub>2</sub> adsorption/desorption isotherm of c-MIL-125\_0.4Cu

**Table S5.** Surface area and pore structure for samples. <sup>a</sup> Obtained from the N<sub>2</sub> adsorption experiment. <sup>b</sup> Collected from the literature<sup>1-2</sup>.

| Samples                             | BET surface area          | Pore size | Pore volume             |
|-------------------------------------|---------------------------|-----------|-------------------------|
| <sup>a</sup> c-MIL-125_0.4Cu        | 178 m <sup>2</sup> /g     | 8.5 nm    | 0.38 cm <sup>3</sup> /g |
| <sup>b</sup> MIL-125 <sup>1</sup>   | 1254 m <sup>2</sup> /g    | 0.9 nm    | 0.52 cm <sup>3</sup> /g |
| <sup>b</sup> c-MIL-125 <sup>1</sup> | 60 m <sup>2</sup> /g      | 3~5 nm    | 0.15 cm <sup>3</sup> /g |
| <sup>b</sup> Cu-BDC <sup>2</sup>    | 507.621 m <sup>2</sup> /g | 6 nm      | 0.34 cm <sup>3</sup> /g |

**Table S6.** Parameters of HER experiments

| <b>Variables</b>          | <b>Trials</b>                            | <b>H<sub>2</sub> (μmol/g)</b> |
|---------------------------|------------------------------------------|-------------------------------|
| <b>Control experiment</b> | No [Ru(bpy) <sub>3</sub> ] <sup>2+</sup> | 0                             |
|                           | No TEOA                                  | 0                             |
|                           | No catalyst                              | 291                           |
|                           | Conventional TiO <sub>2</sub>            | 105                           |
| <b>Current of LED</b>     | 0.1 A                                    | 19036                         |
|                           | 0.2 A                                    | 19669                         |
| <b>Amount of catalyst</b> | 0.2mg c-MIL-125_0.4Cu                    | 19036                         |
|                           | 0.5mg c-MIL-125_0.4Cu                    | 7348                          |
|                           | 1mg c-MIL-125_0.4Cu                      | 6431                          |
| <b>TEOA concentration</b> | 0.1mL TEOA                               | 16471                         |
|                           | 0.2mL TEOA                               | 19036                         |
|                           | 0.4mL TEOA                               | 15642                         |

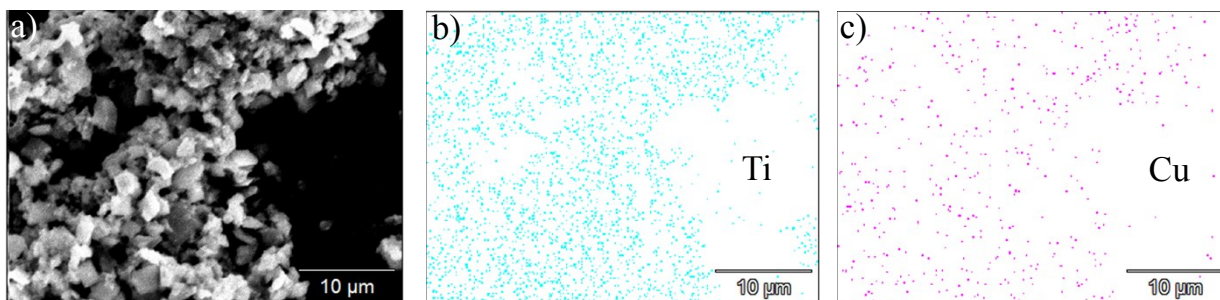**Figure S6.** (a) SEM image of c-MIL-125\_0.4Cu used for measuring EDX; EDX mapping images of c-MIL-125\_0.4Cu for Ti (b) and Cu (c).

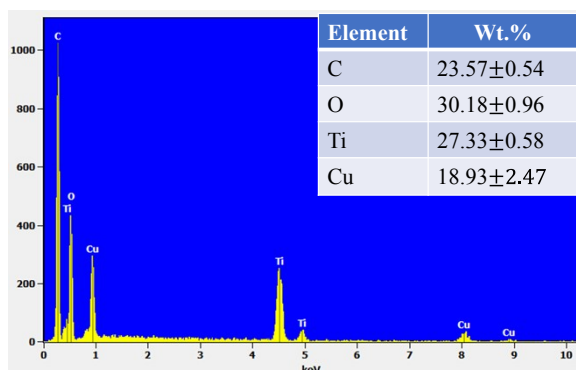

**Figure S7.** EDX data of c-MIL-125\_0.4Cu

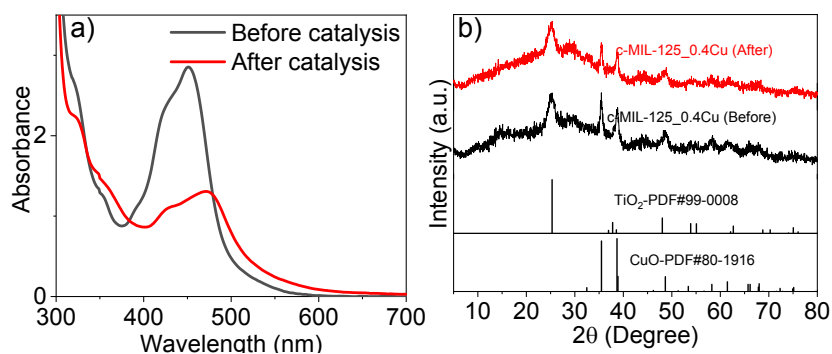

**Figure S8.** (a) The comparison of UV-Visible absorption spectra of  $[\text{Ru}(\text{bpy})_3]^{2+}$  before and after photocatalysis. (b) The comparison of XRD patterns of c-MIL-125\_0.4Cu before and after photocatalysis.

Table S7. Fitting parameters for TA kinetics of  $[\text{Ru}(\text{bpy})_3]^{2+}/\text{Al}_2\text{O}_3$  and  $[\text{Ru}(\text{bpy})_3]^{2+}/\text{c-MIL-125}$  at 500 nm following 450 nm excitation

| MOF                                                    | $\tau_1$ (ps) | $A_1$ (%) | $\tau_2$ (ps) | $A_2$ (%) | $\tau_3$ (ps)    | $A_3$ (%) |
|--------------------------------------------------------|---------------|-----------|---------------|-----------|------------------|-----------|
| $[\text{Ru}(\text{bpy})_3]^{2+}/\text{c-MIL-125}$      | 15.4          | 55.6      | 620.0         | 30.9      | $\gg 5\text{ns}$ | 13.5      |
| $[\text{Ru}(\text{bpy})_3]^{2+}/\text{Al}_2\text{O}_3$ | 4.34          | 54.4      | 697.0         | 27.7      | $\gg 5\text{ns}$ | 17.9      |

## Reference

1. Liao, Y.-T.; Huang, Y.-Y.; Chen, H. M.; Komaguchi, K.; Hou, C.-H.; Henzie, J.; Yamauchi, Y.; Ide, Y.; Wu, K. C., Mesoporous TiO<sub>2</sub> Embedded with a Uniform Distribution of CuO Exhibit Enhanced Charge Separation and Photocatalytic Efficiency. *ACS Appl. Mater. Interfaces*, **2017**, *9*, 42425-42429.
2. Zhang, H.-X.; Huang, H.-L.; Li, C.-X.; Meng, H.; Lu, Y.-Z.; Zhong, C.-L.; Liu, D.-H.; Yang, Q.-Y., Adsorption Behavior of Metal–Organic Frameworks for Thiophenic Sulfur from Diesel Oil. *Ind. Eng. Chem. Res.* **2012**, *51*, 12449-12455.
